# Supplementary material for: Mass Spectrometry Analysis of Hepcidin Peptides in Experimental Mouse Models
Source: PubMed Central journal article supplement (PMC3050808; doi:10.1371/journal.pone.0016762), 2011-03-08
Supplement: pone.0016762.s002.pdf [file pone.0016762.s002.pdf]

## Supporting Figure S2

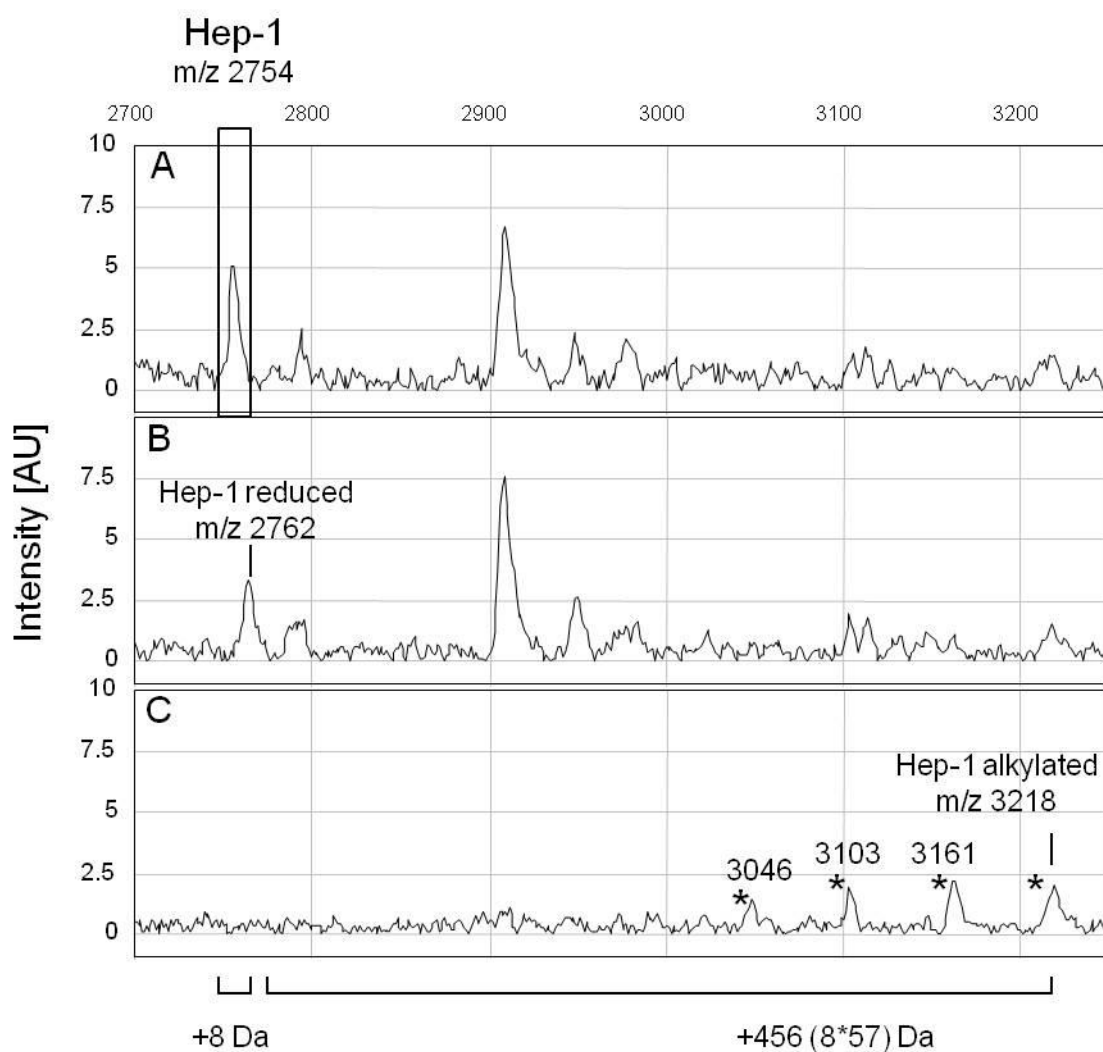

**Figure S2.** Hep-1 contains 4 disulphide bridges. TOF MS profile of a FVB mouse serum sample before (A) and after reduction with DTT (B) and alkylation with IAA (C). Respective mass shifts of +8 Da and +456 Da specify the reduction of 4 disulfide bonds. Note that a partial reaction resulted in an alkylation ladder (peaks indicated with \*) with size difference of 57 Da per moiety (from 5 to 8 modifications). Intensity is given in arbitrary units (AU).
