# Supplementary material for: Mass Spectrometry Analysis of Hepcidin Peptides in Experimental Mouse Models
Source: PubMed Central journal article supplement (PMC3050808; doi:10.1371/journal.pone.0016762), 2011-03-08
Supplement: pone.0016762.s003.pdf [file pone.0016762.s003.pdf]

## Supporting Figure S3

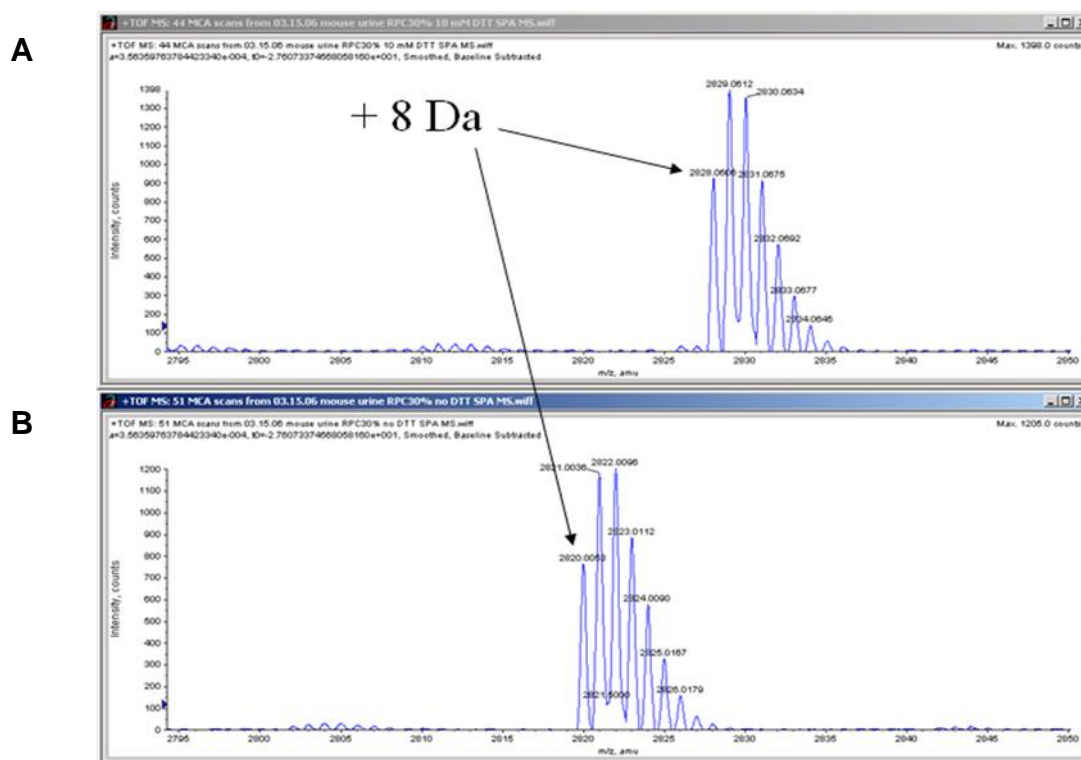

**Figure S3.** Hep-2 contains 4 disulphide bridges. Hep-2 was enriched by IMAC-Cu<sup>2+</sup> on-chip chemistry from urine of a C57Bl6 mouse and analyzed by Q-STARXL MS before (A) and after (B) reduction with DDT; upper spectrum shows reduced Hep-2 (m/z 2828) and lower spectrum: native Hep-2 (m/z 2821). Note that monoisotopic [M+H]<sup>+</sup> masses as measured by Q-STARXL MS are about 1 Dalton lighter than the average masses measured by TOF MS.
