# Supplementary material for: Mass Spectrometry Analysis of Hepcidin Peptides in Experimental Mouse Models
Source: PubMed Central journal article supplement (PMC3050808; doi:10.1371/journal.pone.0016762), 2011-03-08
Supplement: pone.0016762.s004.pdf [file pone.0016762.s004.pdf]

Supporting Figure S4

A

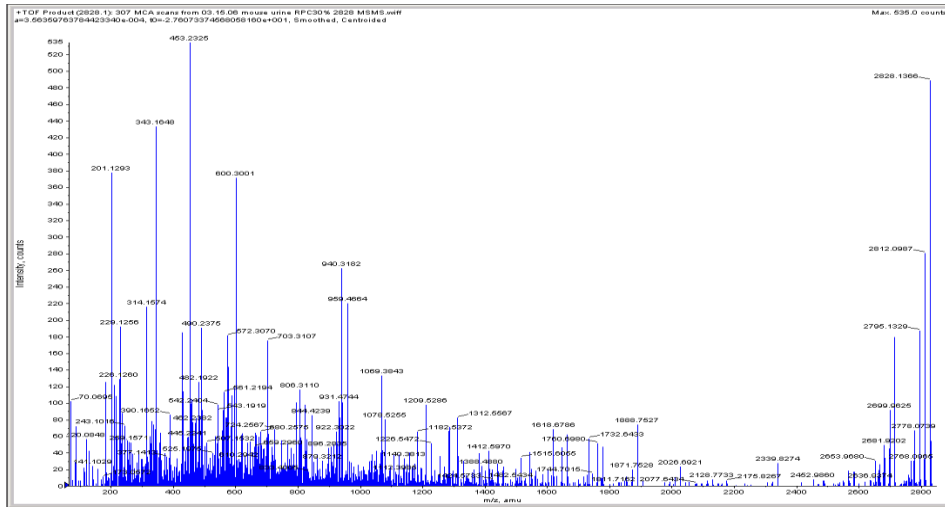

B

Ions score is  $-10 \cdot \log(P)$ , where P is the probability that the observed match is a random event. Individual ions scores > 24 indicate identity or extensive homology ( $p < 0.05$ ). Protein scores are derived from ions scores as a non-probabilistic basis for ranking protein hits.

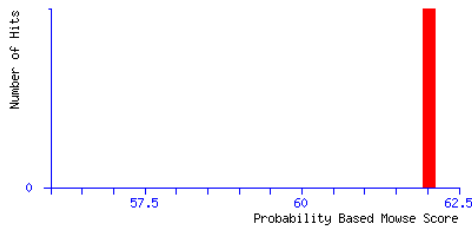

- Q80T19**      **Mass:** 9404      **Score:** 62      **Queries matched:** 1  
 (HEPC2\_MOUSE) Hepcidin-2 precursor Hepcidin-2 precursor  
 Check to include this hit in error tolerant search

| Query                               | Observed         | Mr(expt)  | Mr(calc)  | Delta  | Miss | Score | Exp   |
|-------------------------------------|------------------|-----------|-----------|--------|------|-------|-------|
| <input checked="" type="checkbox"/> | <u>2828.1000</u> | 2827.0927 | 2827.0847 | 0.0081 | 0    | 62    | 8.3e- |

| #  | Immun.   | b         | b*        | b <sup>0</sup> | Seq. | y         | y*        | y <sup>0</sup> | #  |
|----|----------|-----------|-----------|----------------|------|-----------|-----------|----------------|----|
| 1  | 88.0393  | 116.0342  |           | 98.0237        | D    |           |           |                | 25 |
| 2  | 86.0964  | 229.1183  |           | 211.1077       | I    | 2713.0650 | 2696.0384 | 2695.0544      | 24 |
| 3  | 87.0553  | 343.1612  |           | 326.1347       | N    | 2599.9809 | 2582.9544 | 2581.9704      | 23 |
| 4  | 120.0808 | 490.2296  | 473.2031  | 472.2191       | F    | 2485.9380 | 2468.9114 | 2467.9274      | 22 |
| 5  | 70.0651  | 587.2824  | 570.2538  | 569.2718       | P    | 2338.8696 | 2321.8430 | 2320.8590      | 21 |
| 6  | 86.0964  | 700.3664  | 683.3399  | 682.3559       | I    | 2241.8168 | 2224.7903 | 2223.8063      | 20 |
| 7  | 76.0215  | 803.3756  | 786.3491  | 785.3651       | C    | 2128.7328 | 2111.7062 | 2110.7222      | 19 |
| 8  | 129.1135 | 959.4767  | 942.4502  | 941.4662       | R    | 2025.7236 | 2008.6970 | 2007.7130      | 18 |
| 9  | 120.0808 | 1106.5451 | 1089.5186 | 1088.5346      | F    | 1869.6225 | 1852.5959 | 1851.6119      | 17 |
| 10 | 76.0215  | 1209.5543 | 1192.5278 | 1191.5438      | C    | 1732.5541 | 1705.5275 | 1704.5435      | 16 |
| 11 | 76.0215  | 1312.5635 | 1295.5369 | 1294.5529      | C    | 1619.5449 | 1602.5183 | 1601.5343      | 15 |
| 12 | 101.0709 | 1440.6221 | 1423.5955 | 1422.6115      | Q    | 1516.5357 | 1499.5092 | 1498.5251      | 14 |
| 13 | 76.0215  | 1543.6313 | 1526.6047 | 1525.6207      | C    | 1388.4771 | 1371.4506 | 1370.4666      | 13 |
| 14 | 76.0215  | 1646.6404 | 1629.6139 | 1628.6299      | C    | 1268.4414 | 1251.4148 | 1250.4308      | 12 |
| 15 | 87.0553  | 1760.6834 | 1743.6568 | 1742.6728      | N    | 1182.4588 | 1165.4322 | 1164.4482      | 11 |
| 16 | 101.1073 | 1888.7783 | 1871.7518 | 1870.7678      | K    | 1068.4158 | 1051.3893 | 1050.4053      | 10 |
| 17 | 70.0651  | 1985.8311 | 1968.8045 | 1967.8205      | P    | 940.3209  |           | 922.3103       | 9  |
| 18 | 60.0444  | 2072.8631 | 2055.8366 | 2054.8526      | S    | 843.2681  |           | 825.2575       | 8  |
| 19 | 76.0215  | 2175.8723 | 2158.8457 | 2157.8617      | C    | 736.2361  |           | 738.2255       | 7  |
| 20 | 30.0338  | 2232.8938 | 2215.8672 | 2214.8832      | G    | 653.2269  |           | 635.2163       | 6  |
| 21 | 86.0964  | 2345.9778 | 2328.9513 | 2327.9673      | I    | 596.2054  |           | 578.1948       | 5  |
| 22 | 76.0215  | 2448.9870 | 2431.9604 | 2430.9764      | C    | 483.1214  |           | 465.1108       | 4  |
| 23 | 76.0215  | 2551.9962 | 2534.9696 | 2533.9856      | C    | 380.1122  |           | 362.1016       | 3  |
| 24 | 102.0530 | 2681.0388 | 2664.0122 | 2663.0282      | E    | 277.1030  |           | 259.0925       | 2  |
| 25 | 102.0530 |           |           | 2663.0282      | E    | 148.0604  |           | 130.0499       | 1  |

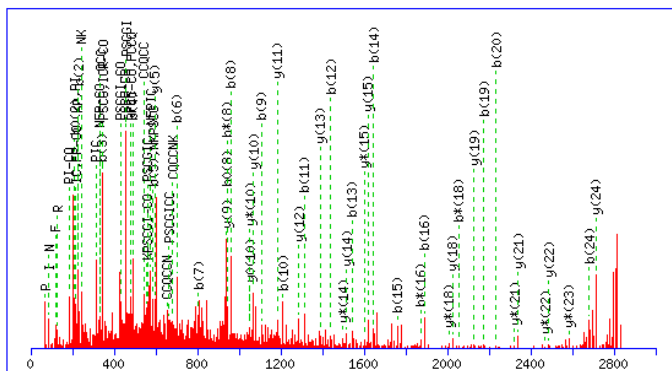

**Figure S4.** Hep-2 identification by Q-STARXL MS/MS. Hep-2 was enriched by IMAC-Cu<sup>2+</sup> on-chip chemistry from urine of a C57Bl6 mouse after which Q-STARXL MS/MS was used to generate fragmentation spectra of the reduced m/z 2828 peptide (A). Database search results for the MS/MS analysis of the m/z 2828 peptide are shown in panel B.
