# Supplementary material for: Mass Spectrometry Analysis of Hepcidin Peptides in Experimental Mouse Models
Source: PubMed Central journal article supplement (PMC3050808; doi:10.1371/journal.pone.0016762), 2011-03-08
Supplement: pone.0016762.s008.pdf [file pone.0016762.s008.pdf]

**Supporting Table S1**

Candidate 8\*Cys mouse peptides with [M+H]<sup>+</sup> monoisotopic masses of m/z 2753.028 ± 50 ppm.

| #ID                | Protein name                    | Amino acids | Peptide sequence                 | theoretical m/z <sup>1</sup> | Δ Mass | ΔPPM  |
|--------------------|---------------------------------|-------------|----------------------------------|------------------------------|--------|-------|
| ENSMUSG00000050440 | Hepcidin-1                      | 58-83       | DTNFPICIFCCKCCNNSQCGICCKT        | 2753.0236                    | 0      | 0     |
| ENSMUSG00000031765 | Metallothionein-1               | 94-122      | LTSSSSFLGCCSCCPVGCSKCAQGCVCK     | 2753.0447                    | -0.021 | -7.68 |
| ENSMUSG00000069583 | Keratin associated protein 12-1 | 29-56       | CQASCFVSSPCQPSCCVSSSCQSACCR      | 2752.9468                    | 0.077  | 27.9  |
| ENSMUSG00000031802 | Per-hexamer repeat gene 4       | 2-25        | CIYVCGVCLCVCFVCMCVHVLVY          | 2753.1078                    | -0.084 | -30.6 |
| ENSMUSG00000063251 | Keratin associated protein 4-1  | 6-27        | GSVCSEESCGQGCCQPSCCQTTCRRTT      | 2752.8951                    | 0.128  | 46.7  |
| ENSMUSG00000049593 | Late cornified envelope 1H      | 35-67       | KCPPVSSCCSLGSGGCCGSSSGGCCGSSSGGC | 2752.8951                    | 0.128  | 46.7  |

Note that monoisotopic [+H] masses as measured by MALDI-FTICR are about 1 Dalton lower than the average mass measured by TOF MS.

<sup>1</sup>Theoretical monoisotopic m/z values were calculated as a singly protonated precursor ion from a peptide that contains 4 disulfide bridges using the ChemCalc algorithm ([www.chemcalc.org](http://www.chemcalc.org)).
